# Supplementary material
Source: PubMed Central journal article supplement (PMC4793397)
Supplement: merd010478.ww1_default.pdf [file merd010478.ww1_default.pdf]

## **Appendix A: Search strategy MEDLINE**

1 influenza.mp. or Influenza, Human/

2 exp Influenza A virus/

3 Influenza, Human/ep, mo

4 flu.mp.

5 or/1-4

6 exp risk/

7 exp epidemics/ or pandemics/

8 (pandemic\* or epidemic\*).mp.

9 exp Mortality/

10 exp Morbidity/

11 morbidit\*.ti.

12 ((mortality or risk or risks or morbidit\* or severe or severity) adj7 influenza).mp.

13 Susceptibil:.ti. and influenza.mp.

14 (Susceptibl\* and influenza).mp.

15 Death/

16 Disease Outbreaks/

17 exp Hospitalization/

18 risk factor\*.mp.

19 exp Disease Transmission, Infectious/

20 (risk or risks or mortality).ti.

21 or/6-20 Page 36

22 5 and 21

23 22 or 3

24 animals/ not humans/

25 23 not 24

The search strategies for the other databases were adapted from the MEDLINE search strategy and are available by request. Page 37

## **Appendix B: References of included studies**

1. Surveillance for laboratory-confirmed influenza requiring hospital admission in adults, metropolitan Toronto and Peel region, 2004-2005 influenza season. *Can Commun Dis Rep* 2005;31(24):249-55.
2. Epidemiological summary of pandemic influenza A (H1N1) 2009 virus - Ontario, Canada, June 2009. *Wkly Epidemiol Rec* 2009;84(47):485-91.
3. Infections humaines par le nouveau virus grippal A (H1N1): observations cliniques en provenance du Mexique et d'autres pays touchés, mai 2009 [French]. *Wkly Epidemiol Rec* 2009;84(21):185-9.
4. Identification of epidemic wave of A H1N1 influenza summer in the city of Valencia. [Spanish] Identificación de la onda epidémica estival por Gripe An H1N1 en la ciudad de Valencia. *Boletín Epidemiológico Semanal* 2009;17(12):133-36.
5. Adeniji KA, Cusack R. The Simple Triage Scoring System (STSS) successfully predicts mortality and critical care resource utilization in H1N1 pandemic flu: A retrospective analysis. *Critical Care* 2011;15(1).
6. Akinçi E, Kayaaslan BU, Yetkin MA, Yılmaz S, Aliravci D, Yıldız S, et al. Evaluation of H1N1 pandemic influenza cases hospitalized in an infectious diseases clinic. *Clinical Microbiology and Infection* 2010;16:S711-S12.
7. Al-Khuwaitir TS, Al-Abdulkarim AS, Abba AA, Yousef AM, El-Din MA, Rahman KT, et al. H1N1 influenza A. Preliminary evaluation in hospitalized patients in a secondary care facility in Saudi Arabia. *Saudi Med J* 2009;30(12):1532-6.
8. Allard R, Leclerc P, Tremblay C, Tannenbaum T-N. Diabetes and the severity of pandemic influenza A (H1N1) infection. *Diabetes Care* 2010;33(7):1491-3.
9. Altmann M, Fiebig L, Soyka J, von Kries R, Dehnert M, Haas W. Severe cases of pandemic (H1N1) 2009 in children, Germany. *Emerging Infectious Diseases* 2011;17(2):186-92.
10. Ampofo K, Gesteland PH, Bender J, Mills M, Daly J, Samore M, et al. Epidemiology, complications, and cost of hospitalization in children with laboratory-confirmed influenza infection. *Pediatrics* 2006;118(6):2409-17.
11. Angelo SJ, Marshall PS, Chrissoheris MP, Chaves AM. Clinical characteristics associated with poor outcome in patients acutely infected with Influenza A. *Conn Med* 2004;68(4):199-205.
12. Arostegi Kareaga N, Montes M, Perez-Yarza EG, Sardon O, Vicent D, Cilla G. Clinical characteristics of children hospitalized for influenza virus infection. [Spanish] Características clínicas de los niños hospitalizados por infección por virus Influenza. *Anales de Pediatría* 2005;62(1):5-12.
13. Babcock HM, Merz LR, Fraser VJ. Is influenza an influenza-like illness? Clinical presentation of influenza in hospitalized patients. *Infect Control Hosp Epidemiol* 2006;27(3):266-70. Page 38

14. Bagdure D, Curtis DJ, Dobyns E, Glode MP, Dominguez SR. Hospitalized children with 2009 pandemic influenza A (H1N1): comparison to seasonal influenza and risk factors for admission to the ICU. *PLoS ONE [Electronic Resource]* 2010;5(12):e15173.
15. Baine WB, Luby JP, Martin SM. Severe illness with influenza B. *Am J Med* 1980;68(2):181-9.
16. Bantar C, Oliva ME, Re HA, Sandillu M, Franco D, Izaguirre M, et al. Severe acute respiratory disease in the setting of an epidemic of swine-origin type A H1N1 influenza at a reference hospital in Entre Rios, Argentina. *Clinical Infectious Diseases* 2009;49(9):1458-60.
17. Bass O, Aepli R. [Influenza complications during the 1969-1970 epidemic]. *Schweiz Rundsch Med Prax* 1970;59(40):1395-400.
18. Bassetti M, Parisini A, Calzi A, Pallavicini FMB, Cassola G, Artioli S, et al. Risk factors for severe complications of the novel influenza A (H1N1): analysis of patients hospitalized in Italy. *Clin Microbiol Infect* 2011;17(2):247-50.
19. Bello-Carrera R, Romero-Lopez Z, Ochoa-Vazquez MD, Reyes-Calderon H, Rico-Mendez FG. H1N1 influenzavirus A infections in pregnant women. [Spanish] Infeccion por virus influenza <i>A</i> H1N1 en pacientes embarazadas. *Revista Medica del Instituto Mexicano del Seguro Social* 2010;48(4):399-404.
20. Belongia EA, Irving SA, Waring SC, Coleman LA, Meece JK, Vandermause M, et al. Clinical characteristics and 30-day outcomes for influenza A 2009 (H1N1), 2008-2009 (H1N1), and 2007-2008 (H3N2) infections. *JAMA* 2010;304(10):1091-8.
21. Bender JM, Ampofo K, Gesteland P, Sheng X, Korgenski K, Raines B, et al. Influenza virus infection in infants less than three months of age. *Pediatric Infectious Disease Journal* 2010;29(1):6-9.
22. Bettinger JA, Sauve LJ, Scheifele DW, Moore D, Vaudry W, Tran D, et al. Pandemic influenza in Canadian children: a summary of hospitalized pediatric cases. *Vaccine* 2010;28(18):3180-84.
23. Blakemore SP, Gopalan PD. Pandemic influenza A (H1N1) 2009: A case series from intensive care units in port Shepstone, South Africa. *Southern African Journal of Anaesthesia and Analgesia* 2010;16(3):17-22.
24. Bozzola E, Krzysztofiak A, Lancella L, Tozzi A. Risk factors of complicated H1N1 influenza in hospitalized Italian children. *Vaccine* 2010;28(33):5387-8.
25. Brocklebank JT, Court SD, McQuillin J, Gardner PS. Influenza-A infection in children. *Lancet* 1972;300(7776):497-500.
26. Buda S, Kopke K, Haas W. [Epidemiological characteristics of the influenza pandemic (H1N1) 2009 in Germany based on the mandatory notification of cases]. *Bundesgesundheitsblatt Gesundheitsforschung Gesundheitsschutz* 2010;53(12):1223-30.
27. Burk RF, Schaffner W, Koenig MG. Severe influenza virus pneumonia in the pandemic of 1968-1969. *Archives of Internal Medicine* 1971;127(6):1122-8. Page 39

28. Byington CL, Pavia AT, Rajendu S, Bender JM, Ampofo K, Gesteland P, et al. Development and validation of a risk score for predicting hospitalization in children with influenza virus infection. *Pediatr Emerg Care* 2009;25(6):369-75.
29. Caler CL, Balsera EC, Lopez JLG, Saez RL. Severe acute respiratory failure in patients with influenza A (H1N1) virus infection admitted in intensive care. *Eur* 2010;21(5):469.
30. Calvo Rey C, Garcia Garcia ML, Casas Flecha I, Martin del Valle F, Centeno Jimenez M, Perez-Brena P. [Influenza virus infections in infants aged less than two years old]. *Anales de Pediatría* 2005;63(1):22-8.
31. Campbell A, Rodin R, Kropp R, Mao Y, Hong Z, Vachon J, et al. Risk of severe outcomes among patients admitted to hospital with pandemic (H1N1) influenza. *Cmaj* 2010;182(4):349-55.
32. Caprotta G, Gonzalez Crotti P, Primucci Y, Alesio H, Esen A. Influenza A H1N1 respiratory infection in an intensive care unit in Argentina. [Spanish] Infeccion respiratoria por influenza A H1N1 en cuidados intensivos de la Republica Argentina. *Anales de Pediatría* 2010;72(1):62-66.
33. Centers for Disease C, Prevention. Severe methicillin-resistant Staphylococcus aureus community-acquired pneumonia associated with influenza--Louisiana and Georgia, December 2006-January 2007. *MMWR - Morbidity & Mortality Weekly Report* 2007;56(14):325-9.
34. Centers for Disease C, Prevention. 2009 pandemic influenza A (H1N1) virus infections - Chicago, Illinois, April-July 2009. *MMWR - Morbidity & Mortality Weekly Report* 2009;58(33):913-8.
35. Centers for Disease C, Prevention. Hospitalized patients with novel influenza A (H1N1) virus infection - California, April-May, 2009. *MMWR - Morbidity & Mortality Weekly Report* 2009;58(19):536-41.
36. Centers for Disease C, Prevention. 2009 pandemic influenza A (H1N1) in pregnant women requiring intensive care - New York City, 2009. *MMWR - Morbidity & Mortality Weekly Report* 2010;59(11):321-6.
37. Chacko J, Gagan B, Ashok E, Radha M, Hemanth HV. Critically ill patients with 2009 H1N1 infection in an Indian ICU. *Indian Journal of Critical Care Medicine* 2010;14(2):77-82.
38. Champunot R, Tanjatham S, Kerdsin A, Puangpatra P, Wangsai S, Treebuphachatsakul P, et al. Impact of pandemic influenza (H1N1) virus-associated community-acquired pneumonia among adults in a tertiary hospital in Thailand. *Japanese Journal of Infectious Diseases* 2010;63(4):251-56.
39. Cheng FWT, Li CH, Shing MMK, Cheuk DKL, Yau JPW, Ling ASC, et al. Clinical presentations and outcome of hospitalised paediatric oncology patients with laboratory-confirmed pandemic h1n1 influenza infection in Hong Kong. *Hong Kong Journal of Paediatrics* 2010;15(3):198-203. Page 40

40. Chien JMF, Tan BH, Yang KS, Tan TT, Low CY, Kurup A, et al. Severe infection with H1N1 requiring intensive care - lessons for preparedness programmes. *Annals of the Academy of Medicine Singapore* 2010;39(4):328-32.
41. Chien Y-S, Su C-P, Tsai H-T, Huang AS, Lien C-E, Hung M-N, et al. Predictors and outcomes of respiratory failure among hospitalized pneumonia patients with 2009 H1N1 influenza in Taiwan. *J Infect* 2010;60(2):168-74.
42. Chitnis AS, Truelove SA, Druckenmiller JK, Heffernan RT, Davis JP. Epidemiologic and clinical features among patients hospitalized in Wisconsin with 2009 H1N1 influenza A virus infections, April to August 2009. *Wmj* 2010;109(4):201-8.
43. Choi EY, Huh JW, Lim CM, Koh Y, Kim SH, Choi SH, et al. Critically ill patients with pandemic influenza A/H1N1 2009 at a Medical Center in Korea. *Tuberculosis and Respiratory Diseases* 2011;70(1):28-35.
44. Choi SS, Kim WY, Kim SH, Hong SB, Lim CM, Koh YS, et al. Associated factor related to major complications of patients with hospitalized for 2009 H1N1 influenza pneumonia. [Korean]. *Tuberculosis and Respiratory Diseases* 2010;68(3):162-67.
45. Choi WI, Yim JJ, Park J, Kim SC, Na MJ, Lee WY, et al. Clinical characteristics and outcomes of H1N1-associated pneumonia among adults in South Korea. *Int J Tuberc Lung Dis* 2011;15(2):270-5.
46. Choi WJ, Kim WY, Kim SH, Oh BJ, Kim W, Lim KS, et al. Clinical characteristics of pneumonia in hospitalized patients with novel influenza A (H1N1) in Korea. *Scand J Infect Dis* 2010;42(4):311-14.
47. Choy J, Draper A, Ribbons E, Vlahos I, Grubnic S, Bicanic T, et al. Assessment of acute illness severity and radiological extent identify patients at heightened risk of developing major pneumonic progression in influenza a H1N1/2009 infection. *Thorax* 2010;65:A179-A80.
48. Chudasama RK, Patel UV, Verma PB. Hospitalizations associated with 2009 influenza A (H1N1) and seasonal influenza in Saurashtra region, India. *J* 2010;4(12):834-41.
49. Chudasama RK, Patel UV, Verma PB, Amin CD, Savaria D, Ninama R, et al. Clinico-epidemiological features of the hospitalized patients with 2009 pandemic influenza A (H1N1) virus infection in Saurashtra region, India (September, 2009 to February, 2010). *Lung India* 2011;28(1):11-15.
50. Chudasama RK, Verma PB, Amin CD, Gohel B, Savariya D, Ninama R. Correlates of severe disease in patients admitted with 2009 pandemic influenza A (H1N1) infection in Saurashtra region, India. *Indian Journal of Critical Care Medicine* 2010;14(3):113-20.
51. Coffin SE, Zaoutis TE, Rosenquist AB, Heydon K, Herrera G, Bridges CB, et al. Incidence, complications, and risk factors for prolonged stay in children hospitalized with community-acquired influenza. *Pediatrics* 2007;119(4):740-8.
52. Coles FB, Balzano GJ, Morse DL. An outbreak of influenza A (H3N2) in a well immunized nursing home population. *J Am Geriatr Soc* 1992;40(6):589-92. Page 41

53. Cost C, Brock E, Adams-Huet B, Siegel JD, Ardura MI. 2009 Pandemic influenza a (H1N1) virus infection in pediatric oncology and hematopoietic stem cell transplantation patients. *Pediatric Blood & Cancer* 2011;56(1):127-33.
54. Creanga AA, Johnson TF, Graitcer SB, Hartman LK, Al-Samarrai T, Schwarz AG, et al. Severity of 2009 pandemic influenza A (H1N1) virus infection in pregnant women. *Obstet Gynecol* 2010;115(4):717-26.
55. Cui W, Zhao H, Lu X, Wen Y, Zhou Y, Deng B, et al. Factors associated with death in hospitalized pneumonia patients with 2009 H1N1 influenza in Shenyang, China. *BMC Infect Dis* 2010;10:145.
56. Cullen G, Martin J, O'Donnell J, Boland M, Canny M, Keane E, et al. Surveillance of the first 205 confirmed hospitalised cases of pandemic H1N1 influenza in Ireland, 28 April - 3 October 2009.[Erratum appears in Euro Surveill. 2009;14(45) pii: 19398]. *Euro Surveill* 2009;14(44).
57. Cutter JL, Ang LW, Lai FYL, Subramony H, Ma S, James L. Outbreak of pandemic influenza A (H1N1-2009) in Singapore, May to September 2009. *Ann Acad Med Singapore* 2010;39(4):273-10.
58. Dawood FS, Fiore A, Kamimoto L, Bramley A, Reingold A, Gershman K, et al. Burden of seasonal influenza hospitalization in children, United States, 2003 to 2008. *J Pediatr* 2010;157(5):808-14.
59. Dawood FS, Fiore A, Kamimoto L, Nowell M, Reingold A, Gershman K, et al. Influenza-associated pneumonia in children hospitalized with laboratory-confirmed influenza, 2003-2008. *Pediatr Infect Dis J* 2010;29(7):585-90.
60. Dee S, Jayathissa S. Clinical and epidemiological characteristics of the hospitalised patients due to pandemic H1N1 2009 viral infection: experience at Hutt Hospital, New Zealand. *New Zealand Medical Journal* 2010;123(1312):45-53.
61. Deguchi Y, Takasugi Y. Efficacy of influenza vaccine in the elderly: reduction in risks of mortality and morbidity during an influenza A (H3N2) epidemic for the elderly in nursing homes. *Int J Clin Lab Res* 2000;30(1):1-4.
62. Devaux I, Kreidl P, Penttinen P, Salminen M, Zucs P, Ammon A. Initial surveillance of 2009 influenza A(H1N1) pandemic in the European Union and European Economic Area, April-September 2009. *Eurosurveillance* 2010;15(49).
63. Di Giambenedetto S, Zileri Dal Verme L, Sali M, Farina S, Di Cristo V, Manzara S, et al. Clinical presentation, microbiological features and correlates of disease severity of 2009 pandemic influenza A (H1N1) infection. *Eur J Clin Microbiol Infect Dis* 2011;30(4):541-9.
64. Diaz E, Rodriguez A, Martin-Loeches I, Lorente L, del Mar Martin M, Pozo JC, et al. Impact of obesity in patients infected with 2009 influenza A(H1N1). *Chest* 2011;139(2):382-6.
65. Diaz Greene E, Rodriguez Weber F, Ojeda-Lopez C, Salcido De Pablo P. Epidemiology and management of critical patients with influenza A H1N1 infection at the Hospital Angeles Pedregal. [Spanish] *Epidemiologia y manejo del paciente critico con Page 42*

- infeccion por influenza A H1N1 en el Hospital Angeles Pedregal. *Medicina Interna de Mexico* 2010;26(4):319-23.
66. Dominguez-Cherit G, Lapinsky SE, Macias AE, Pinto R, Espinosa-Perez L, de la Torre A, et al. Critically ill patients with 2009 influenza A(H1N1) in Mexico. *JAMA* 2009;302(17):1880-7.
67. D'Ortenzio E, Renault P, Jaffar-Bandjee MC, Gauzere BA, Lagrange-Xelot M, Fouillet A, et al. A review of the dynamics and severity of the pandemic A(H1N1) influenza virus on Reunion Island, 2009. (Lessons from the H1N1 influenza pandemic in French overseas territories and interim reports from metropolitan France.). *Clinical Microbiology and Infection* 2010;16(4):309-16.
68. Dubar G, Azria E, Tesniere A, Dupont H, Le Ray C, Baugnon T, et al. French experience of 2009 A/H1N1v influenza in pregnant women. *PLoS ONE [Electronic Resource]* 2010;5(10).
69. Echavarria M, Querci M, Marcone D, Videla C, Martinez A, Bonvehi P, et al. Pandemic (H1N1) 2009 cases, Buenos Aires, Argentina. *Emerging Infectious Diseases* 2010;16(2):311-3.
70. Echevarria-Zuno S, Mejia-Arangure JM, Mar-Obeso AJ, Grajales-Muniz C, Robles-Perez E, Gonzalez-Leon M, et al. Infection and death from influenza A H1N1 virus in Mexico: a retrospective analysis. *Lancet* 2009;374(9707):2072-9.
71. Eriksson C, Randolph A. Factors associated with respiratory failure and mortality among children hospitalized with seasonal influenza and pandemic 2009 H1N1. *Crit Care Med* 2010;38:A6.
72. Espinosa-Aguilar L, Green JS, Forrest GN, Ball ED, Maziarz RT, Strasfeld L, et al. Novel H1N1 Influenza in Hematopoietic Stem Cell Transplantation Recipients: Two Centers' Experiences. *Biology of Blood and Marrow Transplantation* 2011;17(4):566-73.
73. Estenssoro E, Rios FG, Apezteguia C, Reina R, Neira J, Ceraso DH, et al. Pandemic 2009 influenza A in Argentina: a study of 337 patients on mechanical ventilation. *Am J Respir Crit Care Med* 2010;182(1):41-8.
74. Farias JA, Fernandez A, Monteverde E, Vidal N, Arias P, Montes MJ, et al. Critically ill infants and children with influenza A (H1N1) in pediatric intensive care units in Argentina. *Intensive Care Medicine* 2010;36(6):1015-22.
75. Flint SM, Davis JS, Su J-Y, Oliver-Landry EP, Rogers BA, Goldstein A, et al. Disproportionate impact of pandemic (H1N1) 2009 influenza on Indigenous people in the Top End of Australia's Northern Territory. *Med J Aust* 2010;192(10):617-22.
76. Fox BD, Raviv Y, Rozengarten D, Rusanov V, Bakal I, Kramer MR. Pandemic influenza (H1N1): impact on lung transplant recipients and candidates. *Journal of Heart and Lung Transplantation* 2010;29(9):1034-38.
77. Fuhrman C, Bonmarin I, Paty AC, Duport N, Chiron E, Lucas E, et al. Severe hospitalised 2009 pandemic influenza A(H1N1) cases in France, 1 July-15 November 2009. *Euro Surveill* 2010;15(2):14. Page 43



78. Gerardin P, Amrani RE, Cyrille BA, Gabriele M, Guillermin P, Boukerrou M, et al. Low clinical burden of 2009 pandemic influenza a (h1n1) infection during pregnancy on the island of la reunion. *PLoS ONE [Electronic Resource]* 2010;5(5):1-11.
79. Giannattasio A, Lo Vecchio A, Russo MT, Pirozzi MR, Barbarino A, Ruberto E, et al. Pandemic flu: a comparative evaluation of clinical, laboratory, and radiographic findings in HIV-positive and negative children. *Aids* 2010;24(14):2292-4.
80. Gilsdorf A, Poggensee G, Working Group Pandemic Influenza A. Influenza A(H1N1)v in Germany: the first 10,000 cases. *Euro Surveill* 2009;14(34).
81. Gomez-Gomez A, Magana-Aquino M, Garcia-Sepulveda C, Ochoa-Perez UR, Falcon-Escobedo R, Comas-Garcia A, et al. Severe pneumonia associated with pandemic (H1N1) 2009 outbreak, San Luis Potosi, Mexico. *Emerging Infectious Diseases* 2010;16(1):27-34.
82. Gooya MM, Soroush M, Mokhtari-Azad T, Haghdoost AA, Hemati P, Moghadami M, et al. Influenza a (H1N1) pandemic in Iran: Report of first confirmed cases from June to November 2009. *Archives of Iranian Medicine* 2010;13(2):91-98.
83. Gordon CL, Johnson PDR, Permezel M, Holmes NE, Gutteridge G, McDonald CF, et al. Association between severe pandemic 2009 influenza A (H1N1) virus infection and immunoglobulin G(2) subclass deficiency. *Clinical Infectious Diseases* 2010;50(5):672-8.
84. Gubbels S, Perner A, Valentiner-Branth P, Molbak K. National surveillance of pandemic influenza A(H1N1) infection-related admissions to intensive care units during the 2009-10 winter peak in Denmark: two complementary approaches. *Eurosurveillance* 2010;15(49).
85. Hanshaoworakul W, Simmerman JM, Narueponjirakul U, Sanasuttipun W, Shinde V, Kaewchana S, et al. Severe human influenza infections in Thailand: oseltamivir treatment and risk factors for fatal outcome. *PLoS ONE [Electronic Resource]* 2009;4(6):e6051.
86. Harris JW. Influenza occurring in pregnant women: a statistical study of thirteen hundred and fifty cases. *JAMA : the journal of the American Medical Association* 1919;72(14):978-80.
87. Harris PNA, Dixit R, Francis F, Buettner PG, Leahy C, Burgher B, et al. Pandemic influenza H1N1 2009 in north Queensland--risk factors for admission in a region with a large indigenous population. *Communicable Diseases Intelligence* 2010;34(2):102-9.
88. Helferty M, Vachon J, Tarasuk J, Rodin R, Spika J, Pelletier L. Incidence of hospital admissions and severe outcomes during the first and second waves of pandemic (H1N1) 2009. *Cmaj* 2010;182(18):1981-87.
89. Heltzer ML, Coffin SE, Maurer K, Bagashev A, Zhang Z, Orange JS, et al. Immune dysregulation in severe influenza. *J Leukoc Biol* 2009;85(6):1036-43.
90. Henzler T, Meyer M, Kalenka A, Alb M, Schmid-Bindert G, Bartling S, et al. Image Findings of Patients with H1N1 Virus Pneumonia and Acute Respiratory Failure. *Academic Radiology* 2010;17(6):681-85. Page 44

91. Hertzog J, Jeffries HE, Bratton SL, Englund J, Brogan TV. Resource utilization and outcome of children with influenza requiring admission to the pediatric intensive care unit. *Pediatric Critical Care Medicine* 2010;11 (5):665.
92. Hewagama S, Walker SP, Stuart RL, Gordon C, Johnson PDR, Friedman ND, et al. 2009 H1N1 influenza A and pregnancy outcomes in Victoria, Australia. *Clinical Infectious Diseases* 2010;50(5):686-90.
93. Ho Y-C, Wang J-L, Wang J-T, Wu U-I, Chang C-W, Wu H-S, et al. Prognostic factors for fatal adult influenza pneumonia. *J Infect* 2009;58(6):439-45.
94. Hung IF, To KK, Lee C-K, Lee K-L, Chan K, Yan W-W, et al. Convalescent plasma treatment reduced mortality in patients with severe pandemic influenza A (H1N1) 2009 virus infection. *Clinical Infectious Diseases* 2011;52(4):447-56.
95. Irwin DE, Weatherby LB, Huang WY, Rosenberg DM, Cook SF, Walker AM. Impact of patient characteristics on the risk of influenza/ILI-related complications. *BMC Health Services Research* 2001;1(1):8.
96. Jain S, Kamimoto L, Bramley AM, Schmitz AM, Benoit SR, Louie J, et al. Hospitalized patients with 2009 H1N1 influenza in the United States, April-June 2009. *New England Journal of Medicine* 2009;361(20):1935-44.
97. Jimenez MF, El Beitune P, Salcedo MP, Von Ameln AV, Mastalir FP, Braun LD. Outcomes for pregnant women infected with the influenza A (H1N1) virus during the 2009 pandemic in Porto Alegre, Brazil. *Int J Gynaecol Obstet* 2010;111(3):217-9.
98. Jouvett P, Hutchison J, Pinto R, Menon K, Rodin R, Choong K, et al. Critical illness in children with influenza A/pH1N1 2009 infection in Canada. *Pediatric Critical Care Medicine* 2010;11(5):603-9.
99. Kappagoda C, Isaacs D, Mellis C, Peat J, De Silva L, O'Connell A. Critical influenza virus infection. *J Paediatr Child Health* 2000;36(4):318-21.
100. Karapinar DY, Ay Y, Karzaoglu Z, Balkan C, Ergin F, Vardar F, et al. Experience of pandemic influenza with H1N1 in children with leukemia. *Pediatric Hematology and Oncology* 2011;28(1):31-36.
101. Kark JD, Lebiush M. Smoking and epidemic influenza-like illness in female military recruits: a brief survey. *Am* 1981;71(5):530-2.
102. Kawana A, Naka G, Fujikura Y, Kato Y, Mizuno Y, Kondo T, et al. Spanish influenza in Japanese armed forces, 1918-1920. *Emerging Infectious Diseases* 2007;13(4):590-3.
103. Kawayama T, Fujiki R, Rikimaru T, Oizumi K. Clinical study of severe influenza virus pneumonia that caused acute respiratory failure. *Kurume Med J* 2001;48(4):273-9.
104. Kelly PM, Kotsimbos T, Reynolds A, Wood-Baker R, Hancox B, Brown SGA, et al. FluCAN 2009: initial results from sentinel surveillance for adult influenza and pneumonia in eight Australian hospitals. *Med J Aust* 2011;194(4):169-74.
105. Koegelenberg CFN, Iruken EM, Cooper R, Diacon AH, Taljaard JJ, Mowlana A, et al. High mortality from respiratory failure secondary to swine-origin influenza A (H1N1) in South Africa. *Qjm* 2010;103(5):319-25. Page 45

106. Kopel E, Amitai Z, Grotto I, Kaliner E, Volovik I. Patients with pandemic (H1N1) 2009 in intensive care units, Israel. *Emerging Infectious Diseases* 2010;16(4):720-1.
107. Kumar A, Zarychanski R, Pinto R, Cook DJ, Marshall J, Lacroix J, et al. Critically ill patients with 2009 influenza A(H1N1) infection in Canada. *JAMA* 2009;302(17):1872-9.
108. Kumar D, Michaels MG, Morris MI, Green M, Avery RK, Liu C, et al. Outcomes from pandemic influenza A H1N1 infection in recipients of solid-organ transplants: a multicentre cohort study. *Lancet Infect Dis* 2010;10(8):521-6.
109. Kute VB, Godara SM, Goplani KR, Gumber MR, Shah PR, Vanikar AV, et al. High mortality in critically ill patients infected with 2009 pandemic influenza A (H1N1) with pneumonia and acute kidney injury. *Saudi J Kidney Dis Transpl* 2011;22(1):83-9.
110. Kwan-Gett TS, Baer A, Duchin JS. Spring 2009 H1N1 influenza outbreak in King Country Washington. *Disaster Medicine and Public Health Preparedness* 2009;3(SUPPL.2):S109-S16.
111. Langenegger E, Coetzee A, Jacobs S, Le Roux A, Theron G. Severe acute respiratory infection with influenza A (H1N1) during pregnancy. *South African Medical Journal* 2009;99(10):713-16.
112. Launay E, Ovetchkine P, Saint-Jean M, Coic L, Ducruet T, Charest H, et al. Novel influenza A (H1N1): Clinical features of pediatric hospitalizations in two successive waves. *International Journal of Infectious Diseases* 2011;15(2):e122-e30.
113. Launes C, Rives S, Catala A, Berrueco R, Toll T, Camos M, et al. Pandemic influenza A (2009 H1N1) in children with acute lymphoblastic leukaemia. *British Journal of Haematology* 2010;149(6):874-78.
114. Lee EY, McAdam AJ, Chaudry G, Fishman MP, Zurakowski D, Boiselle PM. Swine-origin influenza a (H1N1) viral infection in children: initial chest radiographic findings. *Radiology* 2010;254(3):934-41.
115. Lee N, Choi KW, Chan PKS, Hui DSC, Lui GCY, Wong BCK, et al. Outcomes of adults hospitalised with severe influenza. *Thorax* 2010;65(6):510-5.
116. Lera E, T Worner N, Sancosmed M, Fabregas A, Casquero A, Melendo S, et al. Clinical and epidemiological characteristics of patients with influenza A (H1N1) 2009 attended to at the emergency room of a children's hospital. *Eur J Pediatr* 2011;170(3):371-8.
117. Li G, Yilmaz M, Kojicic M, Fernandez-Perez E, Wahab R, Huskins WC, et al. Outcome of critically ill patients with influenza virus infection. *J Clin Virol* 2009;46(3):275-8.
118. Libster R, Bugna J, Coviello S, Hijano DR, Dunaiewsky M, Reynoso N, et al. Pediatric hospitalizations associated with 2009 pandemic influenza A (H1N1) in Argentina. *New England Journal of Medicine* 2010;362(1):45-55.
119. Lim ML, Chong CY, Tee WSN, Lim WY, Chee JJ. Influenza A/H1N1 (2009) infection in pregnancy - An Asian perspective. *BJOG: An International Journal of Obstetrics and Gynaecology* 2010;117(5):551-56. Page 46

120. Lister P, Reynolds F, Parslow R, Chan A, Cooper M, Plunkett A, et al. Swine-origin influenza virus H1N1, seasonal influenza virus, and critical illness in children. *Lancet* 2009;374(9690):605-7.
121. Liu C, Schwartz BS, Vallabhaneni S, Nixon M, Chin-Hong PV, Miller SA, et al. Pandemic (H1N1) 2009 infection in patients with hematologic malignancy. *Emerging Infectious Diseases* 2010;16(12):1910-17.
122. Ljungman P, Andersson J, Aschan J, Barkholt L, Ehrnst A, Johansson M, et al. Influenza A in immunocompromised patients. *Clinical Infectious Diseases* 1993;17(2):244-7.
123. Loughlin J, Poulivos N, Napalkov P, Wegmuller Y, Monto AS. A study of influenza and influenza-related complications among children in a large US health insurance plan database. *Pharmacoeconomics* 2003;21(4):273-83.
124. Louie JK, Acosta M, Jamieson DJ, Honein MA, California Pandemic Working G. Severe 2009 H1N1 influenza in pregnant and postpartum women in California. *N Engl J Med* 2010;362(1):27-35.
125. Louie JK, Acosta M, Samuel MC, Schechter R, Vugia DJ, Harriman K, et al. A novel risk factor for a novel virus: obesity and 2009 pandemic influenza A (H1N1). *Clin Infect Dis* 2011;52(3):301-12.
126. Louie JK, Acosta M, Winter K, Jean C, Gavali S, Schechter R, et al. Factors associated with death or hospitalization due to pandemic 2009 influenza A(H1N1) infection in California. *JAMA* 2009;302(17):1896-902.
127. Louie JK, Gavali S, Acosta M, Samuel MC, Winter K, Jean C, et al. Children hospitalized with 2009 novel influenza A(H1N1) in California. *Arch Pediatr Adolesc Med* 2010;164(11):1023-31.
128. Louie JK, Jamieson DJ, Rasmussen SA. 2009 pandemic influenza A (H1N1) virus infection in postpartum women in California. *American Journal of Obstetrics and Gynecology* 2011;204(2):144.e1-44.e6.
129. Louie JK, Schechter R, Honarmand S, Guevara HF, Shoemaker TR, Madrigal NY, et al. Severe pediatric influenza in California, 2003-2005: implications for immunization recommendations. *Pediatrics* 2006;117(4):e610-18.
130. Luria DB, Blumenfeld HL, Ellis JT, Kilbourne ED, Rogers DE. Studies on influenza in the pandemic of 1957-1958. II. Pulmonary complications of influenza. *Journal of Clinical Investigation* 1959;38(1 Part 2):213-65.
131. Louriz M, Mahraoui C, Azzouzi A, El Fassy Fihri MT, Zeggwagh AA, Abidi K, et al. Clinical features of the initial cases of 2009 pandemic influenza A (H1N1) virus infection in an university hospital of Morocco. *Int Arch Med* 2010;3:26.
132. Madhi SA, Ramasamy N, Bessellar TG, Saloojee H, Klugman KP. Lower respiratory tract infections associated with influenza A and B viruses in an area with a high prevalence of pediatric human immunodeficiency type 1 infection. *Pediatric Infectious Disease Journal* 2002;21(4):291-7. Page 47

133. Magureanu E, Busuioc C, Ionescu V. Influenza outbreak in a large town of Romania recorded in January-March 1978. *Revue Roumaine de Medecine - Serie de Virologie* 1980;31(1):29-35.
134. Malonda RMC, Moran FG, Luna HV, Balibrea MMS, Rodrigo SG, Perez EP, et al. Pandemic influenza surveillance in the valencian community and seasonal influenza vaccines. [Spanish] Vigilancia de la gripe pandemica en la comunidad valenciana y vacuna antigripal estacional. *Revista Espanola de Salud Publica* 2010;84(5):623-33.
135. Marav-Poma E, Escuchuri J, Macaya L, Aldunate S, Jimenez I, Bentez-Peyrat J, et al. Severity of 2009 pandemic influenza a (H1N1)v infection in pregnant and non pregnant women in Spain. *Intensive Care Medicine* 2010;36:S368.
136. Marcelli D, Marelli C, Richards N. Influenza A(H1N1)v pandemic in the dialysis population: first wave results from an international survey. *Nephrology Dialysis Transplantation* 2009;24(12):3566-72.
137. Martin CM, Kunin CM, Gottlieb LS, Finland M. Asian Influenza A in Boston, 1957-1958. II. Severe Staphylococcal Pneumonia Complicating Influenza. *Archives of Internal Medicine* 1959;103(4):532-42.
138. Martin J, O'Donnell J, Igoe D, O'Hora A, Thornton L, Murphy N, et al. Enhanced surveillance of initial cases of pandemic H1N1 2009 influenza in Ireland, April-July 2009. *Euro Surveill* 2009;14(38):24.
139. Martin SS, Hollingsworth CL, Norfolk SG, Wolfe CR, Hollingsworth JW. Reversible cardiac dysfunction associated with pandemic 2009 influenza A(H1N1). *Chest* 2010;137(5):1195-97.
140. Martin-Loeches I, Lisboa T, Rhodes A, Moreno RP, Silva E, Sprung C, et al. Use of early corticosteroid therapy on ICU admission in patients affected by severe pandemic (H1N1)v influenza A infection. *Intensive Care Medicine* 2011;37(2):272-83.
141. Matsuzaki Y, Katsushima N, Nagai Y, Shoji M, Itagaki T, Sakamoto M, et al. Clinical features of influenza C virus infection in children. *Journal of Infectious Diseases* 2006;193(9):1229-35.
142. Mauch TJ, Bratton S, Myers T, Krane E, Gentry SR, Kashtan CE. Influenza B virus infection in pediatric solid organ transplant recipients. *Pediatrics* 1994;94(2 Pt 1):225-9.
143. McLean E, Pebody RG, Campbell C, Chamberland M, Hawkins C, Nguyen-Van-Tam JS, et al. Pandemic (H1N1) 2009 influenza in the UK: clinical and epidemiological findings from the first few hundred (FF100) cases. *Epidemiol Infect* 2010;138(11):1531-41.
144. Miller RR, 3rd, Markewitz BA, Rolfs RT, Brown SM, Dascomb KK, Grissom CK, et al. Clinical findings and demographic factors associated with ICU admission in Utah due to novel 2009 influenza A(H1N1) infection. *Chest* 2010;137(4):752-8.
145. Milne BG, Williams S, May ML, Kesson AM, Gillis J, Burgess MA. Influenza A associated morbidity and mortality in a Paediatric Intensive Care Unit. *Communicable Diseases Intelligence* 2004;28(4):504-09. Page 48

146. Miroballi Y, Baird JS, Zackai S, Cannon J-M, Messina M, Ravindranath T, et al. Novel influenza A(H1N1) in a pediatric health care facility in New York City during the first wave of the 2009 pandemic. *Arch Pediatr Adolesc Med* 2010;164(1):24-30.
147. Monmany J, Rabella N, Margall N, Domingo P, Gich I, Vazquez G. Unmasking influenza virus infection in patients attended to in the emergency department. *Infection* 2004;32(2):89-97.
148. Moore DL, Vaudry W, Scheifele DW, Halperin SA, Dery P, Ford-Jones E, et al. Surveillance for influenza admissions among children hospitalized in Canadian immunization monitoring program active centers, 2003-2004. *Pediatrics* 2006;118(3):e610-9.
149. Muller MP, McGeer AJ, Hassan K, Marshall J, Christian M. Evaluation of pneumonia severity and acute physiology scores to predict ICU admission and mortality in patients hospitalized for influenza. *PLoS ONE [Electronic Resource]* 2010;25.
150. Mulrennan S, Tempone SS, Ling ITW, Williams SH, Gan G-C, Murray RJ, et al. Pandemic influenza (H1N1) 2009 pneumonia: CURB-65 score for predicting severity and nasopharyngeal sampling for diagnosis are unreliable. *PLoS ONE [Electronic Resource]* 2010;5(9):e12849.
151. Na S, Kim MN, Kim WY, Kim W, Hong SB, Lim CM, et al. Prevalence and clinical features of pneumonia in patients with laboratory-confirmed pandemic influenza A H1N1 2009 infection in South Korea. *Scand J Infect Dis* 2011;43(1):19-26.
152. Napolitano LM, Park PK, Sihler KC, Papadimos T, Chenoweth C, Cinti S, et al. Intensive-care patients with severe novel influenza A (H1N1) virus infection - Michigan, June 2009. *Morbidity and Mortality Weekly Report* 2009;58(27):749-52.
153. New South Wales public health n. Progression and impact of the first winter wave of the 2009 pandemic H1N1 influenza in New South Wales, Australia. *Euro Surveill* 2009;14(42).
154. Nguyen-Van-Tam JS, Openshaw PJM, Hashim A, Gadd EM, Lim WS, Semple MG, et al. Risk factors for hospitalisation and poor outcome with pandemic A/H1N1 influenza: United Kingdom first wave (May-September 2009). *Thorax* 2010;65(7):645-51.
155. Nicolay N, Callaghan MA, Domegan LM, Oza AN, Marsh BJ, Flanagan PC, et al. Epidemiology, clinical characteristics and resource implications of pandemic (H1N1) 2009 in intensive care units in Ireland. *Crit Care Resusc* 2010;12(4):255-61.
156. Nishiyama M, Yoshida Y, Sato M, Nishioka M, Kato T, Kanai T, et al. Characteristics of paediatric patients with 2009 pandemic influenza A(H1N1) and severe, oxygen-requiring pneumonia in the Tokyo region, 1 September-31 October 2009. *Eurosurveillance* 2010;15(36).
157. Nougairède A, Ninove L, Zandotti C, Thiberville SD, Gazin C, Scola BI, et al. Interim report on the A/H1N1 influenza virus pandemic in Marseille, France, April-November 2009. (Lessons from the H1N1 influenza pandemic in French overseas territories and

- interim reports from metropolitan France.). *Clinical Microbiology and Infection* 2010;16(4):322-25.
158. Oliveira EC, Marik PE, Colice G. Influenza pneumonia: a descriptive study. *Chest* 2001;119(6):1717-23.
159. Oliveira W, Carmo E, Penna G, Kuchenbecker R, Santos H, Araujo W, et al. Pandemic H1N1 influenza in Brazil: analysis of the first 34,506 notified cases of influenza-like illness with severe acute respiratory infection (SARI).[Erratum appears in Euro Surveill. 2009;14(43) pii: 19382]. *Euro Surveill* 2009;14(42).
160. Orellano PW, Reynoso JI, Carlino O, Uez O. Protection of trivalent inactivated influenza vaccine against hospitalizations among pandemic influenza A (H1N1) cases in Argentina. *Vaccine* 2010;28(32):5288-91.
161. O'Riordan S, Barton M, Yau Y, Read SE, Allen U, Tran D. Risk factors and outcomes among children admitted to hospital with pandemic H1N1 influenza. *Cmaj* 2010;182(1):39-44.
162. Ormsby CE, de la Rosa-Zamboni D, Vazquez-Perez J, Ablanedo-Terrazas Y, Vega-Barrientos R, Gomez-Palacio M, et al. Severe 2009 pandemic influenza A (H1N1) infection and increased mortality in patients with late and advanced HIV disease. *Aids* 2011;25(4):435-9.
163. Palacios G, Hornig M, Cisterna D, Savji N, Bussetti AV, Kapoor V, et al. Streptococcus pneumoniae coinfection is correlated with the severity of H1N1 pandemic influenza. *PLoS ONE [Electronic Resource]* 2009;4(12):e8540.
164. Parakh A, Kumar A, Kumar V, Kumar Dutta A, Khare S. Pediatric hospitalizations associated with 2009 pandemic influenza a (H1N1): An experience from a tertiary care center in North India. *Indian Journal of Pediatrics* 2010;77(9):981-85.
165. Parcevaux M, Boisson V, Lemant J, Antok E, Thibault L, Garcia C, et al. Outbreak of influenza A(H1N1)/2009: Description of cases and crisis management in a ICU in Reunion Island. [French] Epidemie de grippe A(H1N1/2009: description des cas et experience de gestion de crise dans un service de reanimation reunionnais. *Annales Francaises d'Anesthesie et de Reanimation* 2010;29(12):902-08.
166. Patarroyo GD, Patarroyo MM, Prada AC, Simbaqueba CA, Sanabria OO. Clinical presentation of patients with 2009 Influenza A (H1N1) virus admitted to the medical Intensive Care Unit vs ambulatory-treated patients. *Chest. Conference: CHEST* 2010;138(4).
167. Patel P, Sweiss K, Shatavi S, Peace D, Clark N, Rondelli D. The impact of novel influenza A (H1N1) after hematopoietic SCT. *Bone Marrow Transplantation* 2010;45(12):1756-57.
168. Pedroni E, Garcia M, Espinola V, Guerrero A, Gonzalez C, Olea A, et al. Outbreak of 2009 pandemic influenza A(H1N1), Los Lagos, Chile, April-June 2009. *Euro Surveill* 2010;15(1):7. Page 50

169. Pereira JM, Moreno R, Matos R, Martin-Loeches I, Cecconi M, Lisboa T, et al. Curb-65 in pandemic influenza a (H1N1)v: Results of the esicm influenza a (H1N1)v registry. *Intensive Care Medicine* 2010;36:S370.
170. Perez Navero JL, Rumbao Aguirre J, Correias Sanchez A, Saldana Garcia N, Munoz-Villanueva MC, Ibarra De La Rosa I. Clinical characteristics of patients with infection due to Influenza A (H1N1) 2009 and critical pathology. [Spanish] Caracteristicas clinicas de pacientes con infeccion por Influenza A (H1N1) 2009 y patologia critica. *Anales de Pediatria* 2011;74(2):97-102.
171. Perez-Padilla R, de la Rosa-Zamboni D, Ponce de Leon S, Hernandez M, Quinones-Falconi F, Bautista E, et al. Pneumonia and respiratory failure from swine-origin influenza A (H1N1) in Mexico. *New England Journal of Medicine* 2009;361(7):680-9.
172. Perez-Padilla R, Fernandez R, Garcia-Sancho C, Franco-Marina F, Aburto O, Lopez-Gatell H, et al. Pandemic (H1N1) 2009 virus and Down syndrome patients. *Emerging Infectious Diseases* 2010;16(8):1312-4.
173. Plessa E, Diakakis P, Gardelis J, Thirios A, Koletsi P, Falagas ME. Clinical features, risk factors, and complications among pediatric patients with pandemic influenza A (H1N1). *Clin Pediatr (Phila)* 2010;49(8):777-81.
174. Podewils LJ, Liedtke LA, McDonald LC, Hageman JC, Strausbaugh LJ, Fischer TK, et al. A national survey of severe influenza-associated complications among children and adults, 2003-2004. *Clinical Infectious Diseases* 2005;40(11):1693-6.
175. Poggensee G, Gilsdorf A, Buda S, Eckmanns T, Claus H, Altmann D, et al. The first wave of pandemic influenza (H1N1) 2009 in Germany: from initiation to acceleration. *BMC Infect Dis* 2010;10:155.
176. Pramanick A, Rathore S, Peter JV, Moorthy M, Lionel J. Pandemic (H1N1) 2009 virus infection during pregnancy in South India. *Int J Gynaecol Obstet* 2011;113(1):32-5.
177. Quach C, Piche-Walker L, Platt R, Moore D. Risk factors associated with severe influenza infections in childhood: implication for vaccine strategy. *Pediatrics* 2003;112(3).
178. Rabagliati BR, Benitez GR, Fernandez MA, Gaete GP, Guzman DAM, Garcia CP, et al. Influenza-A as etiology of fever and respiratory insufficiency in adults hospitalized during an outbreak in Chile. [Spanish] Reconocimiento de influenza-A como etiologia de sindrome febril e insuficiencia respiratoria en adultos hospitalizados durante brote en la comunidad. *Revista Medica de Chile* 2004;132(3):317-24.
179. Ribeiro A, Freitas GD, Pellini ACG, Carvalhanas TRMP, Yu ALF, Liphau BDL, et al. Deaths in women during fertile years and pregnant women as confirmed for pandemic influenza A (H1N1) in the state of Sao Paulo. *International Journal of Infectious Diseases* 2010;14:e96.
180. Ribeiro A, Pellini ACG, Carvalhanas TRMP, Liphau BDL, Yu ALFLF, Freitas GD, et al. Factors associated to death in patients with confirmed diagnosis for influenza A/H1N1. State of Sao Paulo, Brazil, April to October, 2009. *International Journal of Infectious Diseases* 2010;14:e95. Page 51



181. Riera M, Payeras A, Marcos MA, Viasus D, Farinas MC, Segura F, et al. Clinical presentation and prognosis of the 2009 H1N1 influenza A infection in HIV-1-infected patients: a Spanish multicenter study. *Aids* 2010;24(16):2461-7.
182. Riquelme R, Jimenez P, Videla AJ, Lopez H, Chalmers J, Singanayagam A, et al. Predicting mortality in hospitalized patients with 2009 H1N1 influenza pneumonia. *Int J Tuberc Lung Dis* 2011;15(4):542-6.
183. Riquelme R, Riquelme M, Rioseco ML, Inzunza C, Gomez Y, Contreras C, et al. Characteristics of hospitalised patients with 2009 H1N1 influenza in Chile. *European Respiratory Journal* 2010;36(4):864-9.
184. Sahoo JN, Banani P, Afzal A, Singh RK, Mohan G, Baronia AK. Pandemic (H1N1) 2009 influenza: experience from a critical care unit in India. *Indian Journal of Critical Care Medicine* 2010;14(3):156-59.
185. Sam IC, Abdul-Murad A, Karunakaran R, Rampal S, Chan Y-F, Nathan AM, et al. Clinical features of Malaysian children hospitalized with community-acquired seasonal influenza. *International Journal of Infectious Diseases* 2010;14 Suppl 3:e36-40.
186. Sandar S, Chow A, Lye D, Barkham T, Leo YS. Risk factors associated with severe influenza in tropical Singapore. *International Journal of Infectious Diseases* 2010;14:S48.
187. Santa-Olalla Peralta P, Cortes Garcia M, Limia Sanchez A, Andres Prado J, Pachon Del Amo I, Sierra Moros MJ, et al. [Critically ill patients with 2009 pandemic influenza A (H1N1) infection in Spain: factors associated with death, April 2009-January 2010]. *Revista Espanola de Salud Publica* 2010;84(5):547-67.
188. Santa-Olalla Peralta P, Cortes-Garcia M, Vicente-Herrero M, Castrillo-Villamandos C, Arias-Bohigas P, Pachon-del Amo I, et al. Risk factors for disease severity among hospitalised patients with 2009 pandemic influenza A (H1N1) in Spain, April - December 2009. *Euro Surveill* 2010;15(38):23.
189. Satterwhite L, Mehta A, Martin GS. Novel findings from the second wave of adult pH1N1 in the United States. *Crit Care Med* 2010;38(10):2059-61.
190. Schnell D, Mayaux J, de Bazelaire C, Legoff J, Feuillet S, Scieux C, et al. Risk factors for pneumonia in immunocompromised patients with influenza. *Respir Med* 2010;104(7):1050-6.
191. Schrag SJ, Shay DK, Gershman K, Thomas A, Craig AS, Schaffner W, et al. Multistate surveillance for laboratory-confirmed, influenza-associated hospitalizations in children: 2003-2004. *Pediatric Infectious Disease Journal* 2006;25(5):395-400.
192. Serwint JR, Miller RM, Korsch BM. Influenza type A and B infections in hospitalized pediatric patients. Who should be immunized? *Am J Dis Child* 1991;145(6):623-6.
193. Shin S, Kim J, Kim H, Kang Young A, Lee H, Kim J, et al. Clinical characteristics of korean pediatric patients critically ill with influenza A (H1N1) virus. *Pediatric Pulmonology* 2010;45(10):1014-20. Page 52

194. Siau C, Law J, Tee A, Poulouse V, Raghuram J. Severe refractory hypoxaemia in H1N1 (2009) intensive care patients: initial experience in an Asian regional hospital. *Singapore Medical Journal* 2010;51(6):490-95.
195. Silvennoinen H, Peltola V, Vainionpaa R, Ruuskanen O, Heikkinen T. Incidence of influenza-related hospitalizations in different age groups of children in Finland: A 16-year study. *Pediatric Infectious Disease Journal* 2011;30(2):e24-e28.
196. Siston AM, Rasmussen SA, Honein MA, Fry AM, Seib K, Callaghan WM, et al. Pandemic 2009 influenza A(H1N1) virus illness among pregnant women in the United States. *JAMA* 2010;303(15):1517-25.
197. Skarbinski J, Jain S, Bramley A, Lee EJ, Huang J, Kirschke D, et al. Hospitalized patients with 2009 pandemic influenza A (H1N1) virus infection in the United States--September-October 2009. *Clinical Infectious Diseases* 2011;52 Suppl 1:S50-9.
198. Sovilj-Gmizic SM, Obradovic D, Joves Sevic B, Batranovic U, Andrijevic I, Gavrilovic S, et al. Obesity as a risk factor associated with death due to 2009 pandemic influenza a (H1N1). *Intensive Care Medicine* 2010;36:S368.
199. Staikowsky F, D'Andrea C, Filleul L, Guiserix J, Vanhecke C, Winer A, et al. Outbreak of influenza pandemic virus A(H1N1) 2009 infections in Emergency Department, Saint-Pierre, Reunion Island. July-August 2009. [French] Prise en charge dans un service d'urgence de l'epidemie a virus pandemique A(H1N1) 2009 a Saint-Pierre, ile de La Reunion. Juillet-Aout 2009. *Presse Medicale* 2010;39(7-8):e147-e57.
200. Stein M, Tasher D, Glikman D, Shachor-Meyouhas Y, Barkai G, Yochai AB, et al. Hospitalization of children with influenza A(H1N1) virus in Israel during the 2009 outbreak in Israel: a multicenter survey. *Arch Pediatr Adolesc Med* 2010;164(11):1015-22.
201. Strouse JJ, Reller ME, Bundy DG, Amoako M, Cancio M, Han RN, et al. Severe pandemic H1N1 and seasonal influenza in children and young adults with sickle cell disease. *Blood* 2010;116(18):3431-4.
202. Subramony H, Lai FYL, Ang LW, Cutter JL, Lim PL, James L. An epidemiological study of 1348 cases of pandemic H1N1 influenza admitted to Singapore Hospitals from July to September 2009. *Ann Acad Med Singapore* 2010;39(4):283-8.
203. Talmor D, Jones A, Howell M, Rubinson L, Shapiro N. A simple triage scoring system predicting death and need for critical resources for use during epidemics 2007 Society for Academic Emergency Medicine Annual Meeting. *Crit Care Med* 2007;35(5):1251-56.
204. Ting A, Aniruddhan K, Hallam N, Freeman J, McFadzean J. Severe influenza in children with neurodevelopmental impairment--implications for vaccination policy. *J Infect* 2006;53(2):144-6.
205. Tuite AR, Greer AL, Whelan M, Winter A-L, Lee B, Yan P, et al. Estimated epidemiologic parameters and morbidity associated with pandemic H1N1 influenza. *Cmaj* 2010;182(2):131-6. Page 53

206. Tutuncu EE, Ozturk B, Gurbuz Y, Haykir A, Sencan I, Kuscu F, et al. Clinical characteristics of 74 pandemic H1N1 influenza patients from Turkey. Risk factors for fatality. *Saudi Med J* 2010;31(9):993-8.
207. Ukimura A, Izumi T, Matsumori A. A national survey on myocarditis associated with the 2009 influenza a (H1N1) pandemic in Japan. *Circulation Journal* 2010;74(10):2193-99.
208. van 't Klooster TM, Wielders CC, Donker T, Isken L, Meijer A, van den Wijngaard CC, et al. Surveillance of hospitalisations for 2009 pandemic influenza A(H1N1) in the Netherlands, 5 June - 31 December 2009. *Euro Surveill* 2010;15(2):14.
209. Varner M. Influenza-like illness in hospitalized pregnant and immediately postpartum women during the 2009-2010 H1N1 influenza pandemic. *American Journal of Obstetrics and Gynecology* 2011;204 (1 SUPPL.):S43.
210. Vasoo S, Singh K, Trenholme GM. Predicting need for hospitalization of patients with pandemic (H1N1) 2009, Chicago, Illinois, USA. *Emerging Infectious Diseases* 2010;16(10):1594-7.
211. Venkata C, Sampathkumar P, Afessa B. Hospitalized patients with 2009 H1N1 influenza infection: the Mayo Clinic experience. *Mayo Clin Proc* 2010;85(9):798-805.
212. Viasus D, Ramon Pano-Pardo J, Cordero E, Campins A, Lopez-Medrano F, Villoslada A, et al. Effect of immunomodulatory therapies in patients with pandemic influenza A (H1N1) 2009 complicated by pneumonia. *J Infect* 2011;62(3):193-99.
213. von Oldershausen H, Marsch W. [On the clinical picture of the influenza epidemic 1957/8 (with special reference to complications of the respiratory tract)]. *Z Klin Med* 1959;156:169-98.
214. Wada K, Nishiura H, Kawana A. An epidemiological analysis of severe cases of the influenza A (H1N1) 2009 virus infection in Japan. *Influenza other respi* 2010;4(4):179-86.
215. Wang Y-H, Huang Y-C, Chang L-Y, Kao H-T, Lin P-Y, Huang C-G, et al. Clinical characteristics of children with influenza A virus infection requiring hospitalization. *J Microbiol Immunol Infect* 2003;36(2):111-6.
216. Wang ZF, Su F, Lin XJ, Dai B, Kong LF, Zhao HW, et al. Serum D-dimer changes and prognostic implication in 2009 novel influenza A(H1N1). *Thromb Res* 2011;127(3):198-201.
217. Wei JY, Chen FF, Jin J, Mai WY, Qian WB, Meng HT, et al. Novel influenza A (H1N1) in patients with hematologic disease. *Leukemia and Lymphoma* 2010;51(11):2079-83.
218. Wenger JD, Castrodale LJ, Bruden DL, Keck JW, Zulz T, Bruce MG, et al. 2009 Pandemic influenza A H1N1 in Alaska: temporal and geographic characteristics of spread and increased risk of hospitalization among Alaska Native and Asian/Pacific Islander people. *Clinical Infectious Diseases* 2011;52 Suppl 1:S189-97. Page 54

219. Wiegand JA, Torgersen C, Bloechlinger S, Takala J, Dunser MW. Influenza A(H1N1) infection and severe cardiac dysfunction in adults: A case series. *Wiener Klinische Wochenschrift* 2011;123(3-4):120-23.
220. Woolston W, Conley DO. Epidemic pneumonia (Spanish Influenza) in pregnancy: effect of one hundred and one cases. *Am J Obstet Gynecol* 1918;71:1898.
221. Wootton S, Scheifele D, Mozel M, Moore D, Vaudry W, Halperin S, et al. The epidemiology of influenza in children hospitalized in Canada, 2004-2005, in Immunization Monitoring Program B Active (IMPACT) centres. *Canada Communicable Disease Report* 2006;32(7):77-86.
222. Xi X, Xu Y, Jiang L, Li A, Duan J, Du B, et al. Hospitalized adult patients with 2009 influenza A(H1N1) in Beijing, China: risk factors for hospital mortality. *BMC Infect Dis* 2010;10:256.
223. Yang P, Deng Y, Pang X, Shi W, Li X, Tian L, et al. Severe, critical and fatal cases of 2009 H1N1 influenza in China. *J Infect* 2010;61(4):277-83.
224. Yeung JH, Bailey M, Perkins GD, Smith FG. Presentation and management of critically ill patients with influenza A (H1N1): a UK perspective. *Crit Care* 2009;13(6):426; author reply 26.
225. Yu H, Feng Z, Uyeki TM, Liao Q, Zhou L, Feng L, et al. Risk factors for severe illness with 2009 pandemic influenza A (H1N1) virus infection in China. *Clinical Infectious Diseases* 2011;52(4):457-65.
226. Yung M, Slater A, Festa M, Williams G, Erickson S, Pettila V, et al. Pandemic H1N1 in children requiring intensive care in Australia and New Zealand during winter 2009. *Pediatrics* 2011;127(1):e156-63.
227. Zenciroglu A, Kundak AA, Aydin M, Okumus N, Dursun A, Ipek MS, et al. Swine influenza A (H1N1) virus infection in infants. *Eur J Pediatr* 2011;170(3):333-8.
228. Zykova I, vancar P, Pratingerov J, Sedlk P, Krejzar Z, Remeta P, et al. Analysis of the impact of pandemic influenza 2009 a H1N1 outbreak on intensive care in a tertiary care hospital. *Intensive Care Medicine* 2010;36:S284.
229. Agrati C, Gioia C, Lalle E, Cimini E, Castilletti C, Armignacco O, et al. Association of profoundly impaired immune competence in H1N1v-infected patients with a severe or fatal clinical course. *Journal of Infectious Diseases* 2010;202(5):681-89.
230. Isais F, Lye D, Llorin R, Dimatatac F, Go C-J, Leo Y-S, et al. Pandemic (H1N1) 2009 influenza in HIV-infected adults: clinical features, severity, and outcome. *J Infect* 2010;61(5):437-40.
231. Lee EH, Wu C, Lee EU, Stoute A, Hanson H, Cook HA, et al. Fatalities associated with the 2009 H1N1 influenza A virus in New York city. *Clinical Infectious Diseases* 2010;50(11):1498-504.
232. Martinez E, Marcos M, Hoyo-Ulloa I, Anton A, Sanchez M, Vilella A, et al. Influenza A H1N1 in HIV-infected adults(\*). *HIV Med* 2011;12(4):236-45. Page 55

233. Mata-Marin JA, Ascencio-Montiel I, Gaytan-Martinez JE, Arias-Flores R, Martinez-Chacon C. Predictive factors for mortality among in-hospital Mexican patients infected with influenza A/H1N1. *Clinical Microbiology and Infection* 2010;16:S302.
234. Zarychanski R, Stuart TL, Kumar A, Doucette S, Elliott L, Kettner J, et al. Correlates of severe disease in patients with 2009 pandemic influenza (H1N1) virus infection. *Cmaj* 2010;182(3):257-64.
